# Supplementary material
Source: Springer Nature journal article supplement (https://www.springermedizin.de/resource/supplementary/12963_2011_197_MOESM2_ESM.pdf/9572326)
Supplement: MOESM2 [file 9572326]

## Additional file 2.

### Quality Index criteria

**1. Were the target population and the observation period well defined?**

Yes = 1

No = 0

**2. Diagnostic criteria**

Use of diagnostic system reported (DSM, ICD, RDC) = 1

Own system /symptoms described/no system/not specified = 0

**3. Method of case ascertainment**

Community survey/multiple institutions = 2

Inpatient/inpatients and outpatients/case registers = 1

Not specified = 0

**4. Administration of measurement protocol**

Administered interview = 3

Systematic case note review = 2

Chart diagnosis/case records = 1

Not specified = 0

**5. Catchment Area**

Broadly representative (national or multi-site survey) = 2

Small area/not representative (single community, single university) = 1

Convenience sampling/ other (primary care sample/treatment group) = 0

**6. Prevalence measure**

Point prevalence (e.g. one month) = 2

12-month prevalence = 1

Lifetime prevalence = 0

**Maximum Score = 11**
